# Supplementary material for: Seasonal variation of aerosol iron solubility in coarse and fine particles at an inland city in northwestern China
Source: Copernicus journal article supplement (doi:10.5194/acp-2022-725), 2022-11-02
Supplement: Supplementary file [file acp-2022-725-AC3-supplement.pdf]

Comments by referees are in blue.

Our replies are in black.

Changes to the manuscript are highlighted in red both here and in the revised manuscript.

### Reply to referee #3

#### General comments

The study reports seasonal variation of total and dissolved Fe concentrations and fractional solubility in coarse and fine particles collected in Xi'an. More than 120 samples collected over a year are a valuable data set on Fe solubility in East Asia, which can contribute to a better understanding of the factors controlling Fe solubility. However, these valuable data sets were not fully utilized in the paper, as the discussion in this paper is mainly about averages (or medians) for concentrations and Fe solubility. There was no discussion of total and dissolved Fe or its solubility during the two Asian dust events, which have the potential to be important Fe supply events to the ocean surface. Furthermore, Fe solubility in some of the winter samples exceeded 5%, and the reasons for their high solubility should be mentioned. It would be desirable to discuss the daily variation of Fe concentration and Fe solubility in each season to solve these problems.

**Reply:** In addition to average and median values, in our original manuscript we also discussed the dependence of Fe solubility on air mass sources in different seasons (Section 4.2), and the dependence of Fe solubility on chemical aging in different seasons (Section 4.3).

It is a good idea to discuss Fe solubility during dust events and winter haze periods. In response to this comment, in the revised manuscript (page 22-23) we have added a new section (Section 4.1.3, and it has two paragraphs) to discuss Fe solubility during dust events in spring and high-RH haze periods in winter. Please kindly refer to our revised manuscript for more details.

The importance of anthropogenic Fe on enhancement of Fe solubility in fine aerosol particles were reported by this study. However, the discussions on the emission sources of anthropogenic Fe and its tracer elements are a little bit broad. For instance, the dominant source of anthropogenic Fe in coarse and fine aerosol particles was biomass burning due to a good correlation between dissolved Fe and K<sup>+</sup> concentrations. It is suspicious that K<sup>+</sup> in coarse particles is from biomass burning because aerosols from high-temperature combustion, including biomass burning, are abundant in fine aerosol particles. As the authors said in the introduction, emission sources and physicochemical properties are different between coarse and fine aerosol particles. Therefore, discussions on the emission source of anthropogenic Fe and its tracer elements in each size fraction is required. I think that Table S3 is supported to evaluate the emission source of anthropogenic Fe.

**Reply:** In our original manuscript, indeed our discussion related to sources of dissolve Fe was a little bit broad.

As suggested by ref#3, in the revised manuscript (page 16-17) we have discussed correlations between dissolved Fe and several aerosol species (including but not limited to K<sup>+</sup>) to further use the information provided in Table S3. After revision, we have gained further insights into important sources for dissolved aerosol Fe, including secondary formation, biomass burning, as well as vehicle emission, coal combustion, steel industry and metal smelting. Please refer to the last two paragraphs (page 16-17) in Section 3.3 for more details.

The relationship between aerosol pH and iron solubility is the most important topic in this paper. Aerosol pH in coarse aerosol particles is usually 1 to 4 units higher than that in fine aerosol particles because non-volatile cation (e.g., Na, K, Mg, and Ca) is mainly present in coarse aerosol particles. However, the median aerosol pH in coarse aerosol particles was almost the same or lower than those in fine aerosol particles. If the low pH of the coarse particles is due to a bias in the

thermodynamic calculations, it may overestimate the importance of acidic processes in the coarse particles. Please explain the reason for lower pH in coarse aerosol particles than in fine aerosol particles.

**Reply:** We agree with the referee 1) that aerosol pH are generally expected to be higher for coarse particles than fine particles, and 2) that similar or lower aerosol pH were reported by our work for coarse particles (when compared to fine particles) in spring and autumn. The reasons are not clear yet (likely due to uncertainties in aerosol pH calculation for coarse particles), though we note that lower aerosol pH values were also reported in previous work for coarser particles. The first step is to reduce uncertainties in aerosol pH calculation via concurrent measurement of gaseous species (e.g.,  $\text{NH}_3$  and  $\text{HNO}_3$ ).

In the revised manuscript (page 8-9) we have added a few sentences to discuss these caveats: “The effects of  $\text{NH}_3(\text{g})$  and  $\text{HNO}_3(\text{g})$  were not taken into account as their concentrations were not measured; this may cause some biases (likely underestimation) in calculated aerosol pH (Guo et al., 2015; Hennigan et al., 2015; Pye et al., 2020), but the overall trend of aerosol pH would not be significantly affected. The reverse mode was not used in our work, as results calculated using the reverse mode are very sensitive to uncertainties in concentrations of common aerosol ions (Hennigan et al., 2015). Coarse particles are generally expected to be less acidic than fine particles, and it is not clear yet why similar and even lower aerosol pH were observed for coarse particles (when compared to fine particles) in spring and autumn at Xi’an (Figure S14). This may be caused by biases in aerosol pH calculation, and lower aerosol pH values were also reported in previous work for coarser particles carried out at northern Colorado, United States (Young et al., 2013). Concurrent measurements of gaseous  $\text{NH}_3$ ,  $\text{HNO}_3$  and  $\text{HCl}$  would help reduce uncertainties in calculated aerosol pH and have been implemented in our following studies since July 2022..”

I am also concerned that the Fe solubility reported by this study was much lower than those in aerosol particles collected in China by previous studies. High Fe solubility (>10%) has been observed in aerosol particles collected in China, including Xi’an, but such high Fe solubilities were not found in this study. It is necessary to explain why Fe solubility differs significantly from previous studies, even though the aerosols were collected in the same city.

**Reply:** As suggested by the referee, in the revised manuscript (page 21-22) we have included a new section (Section 4.1.2, and its two paragraphs) to compare our work with previous studies carried out in northern China.

It is true that our reported Fe solubility was much lower than those reported by some previous studies. As explained in Section 4.1.3 in the revised manuscript, it is because previous studies used sonication, larger filter pore size and/or stronger leaching solutions, leading to higher Fe solubility. For more details, please kindly refer to our manuscript (page 21-22).

Since there are several concerns, I cannot recommend the publication of this study in ACP in its current state. However, this manuscript would represent a valuable contribution to the field of aerosol research after major revisions because there are few studies on seasonal variation of Fe solubility and its controlling factors.

**Reply:** We highly appreciate his/her very positive evaluation of our manuscript as well as thorough and insightful comments. We can see that the referee has spent a lot of time on reviewing our manuscript. We have considered all the comments very seriously and addressed them carefully, and revised our manuscript accordingly. These comments have helped us significantly improve our manuscript. If the referee has further comments, we will be very glad to address them.

**Specific comments**

L81–83: Please provide specific examples of how seasonal variations of emission sources and chemical processes of Fe affect its solubility.

**Reply:** That is a very good idea. In the revised manuscript (page 5) we have added the following sentences to provide a few examples: “For example, desert dust aerosol mainly occurs in spring at Xi’an where our present work was conducted, while anthropogenic emission become more important in winter (Cao and Cui, 2021); furthermore, higher temperature in summer causes more ammonium to partition in the gas phase and thus leads to higher aerosol acidity (Ding et al., 2019; Zhou et al., 2022).”

L95: Many readers are not familiar with Xi'an and its surrounding topography. Please provide a map showing the sampling site and the surrounding area.

**Reply:** This is a good suggestion. In the revised manuscript we have provided two maps (Figure S1) in the supporting information, and also revised the main text (page 6) accordingly: “Xi’an has a population of ~13 million and is located in the middle of the Guanzhong Plain which is surrounded by Qinling Mountains and Chinese Loess Plateau (Figure S1)...”

L121: Please clarify acid compositions.

**Reply:** As digestion was detailed in our previous study (Zhang et al., 2022), we only describe the experimental procedure briefly in the present paper and kindly refer readers to our previous study (Zhang et al., 2022) for more information.

L124–126: How were recoveries of target elements determined? If you measure certificated reference material, please specify it.

**Reply:** Indeed certificated reference materials were used, and in the revised manuscript (page 8) we have provided relevant information: “...the recovery rates were found to be 90-110% for Fe using certificated reference materials (GBW07454 and GSB07-3272-2015)”

L135–136: If gas species is not employed as an input parameter, the reverse mode would be the appropriate calculation method.

**Reply:** We did not use the reverse mode, as results calculated using the reverse mode are very sensitive to uncertainties in concentrations of common aerosol ions (Hennigan et al., 2015). In the revised manuscript (page 8-9) we have added one sentence to explain explicitly why the reverse mode was not used in our work: “The reverse mode was not used in our work, as results calculated using the reverse mode are very sensitive to uncertainties in concentrations of common aerosol ions (Hennigan et al., 2015).”

In order to reduce the uncertainties in calculated aerosol pH, measurements of gaseous species are necessary and have been implemented in our later studies since July 2022, as we pointed out in the revised manuscript (page 9): “Concurrent measurements of gaseous NH<sub>3</sub>, HNO<sub>3</sub> and HCl would help reduce uncertainties in calculated aerosol pH and have been implemented in our following studies since July 2022.”

L161–163: I guess that the standard deviation of aerosol mass concentration in spring is too small for the concentration range of PM10. Please confirm it.

**Reply:** The referee is right, and the standard deviation should be 61. We have corrected it in the revised manuscript (page 10).

L182–186: Why were the Fe concentrations of aerosol particles collected in Xi'an higher than those collected in Qingdao? Is Qingdao classified as an industrial, residential, or background area?

**Reply:** Qingdao is a coastal city in the northern China. The main reason for higher total Fe concentrations in Xi’an, when compared to Qingdao, is that aerosol mass concentrations are much higher in Xi’an. In the revised manuscript (page 15) we have added one sentence to explain in

brief why total Fe concentrations were higher in Xi'an: "...mainly because during wintertime aerosol mass concentrations were much higher at Xi'an than Qingdao."

L:185: There is a garbled text between  $1831 \pm 866$  and  $2058 \pm 1037$  ng/m<sup>3</sup>. The same garbled text was found in line 229.

**Reply:** These two errors have been corrected in the revised manuscript (page 11 and page 15).

L190–195: Iron in mineral dust is mainly present in coarse aerosol particles. Indeed, the contribution of aerosol mass concentration of coarse aerosol particles in spring and Asian dust events was larger than in other seasons due to the low PM<sub>2.5</sub>/PM<sub>10</sub> ratio. However, the contribution of Fe in coarse aerosol particles to total Fe in TSP was lower than in other seasons. This result is inconsistent with a mass ratio of PM<sub>2.5</sub>/PM<sub>10</sub>. Please explain the reason for the lowest contribution of Fe in coarse aerosol particles to that in spring samples. In addition, nss-Ca, Al, and Ti are good tracers of Asian dust. Are these elements in the aerosol collected in the spring also present mainly in the fine particles?

**Reply:** We were also quite surprised to notice that the average contribution of coarse particles to total Fe in TSP was lowest in spring when the influence of desert dust aerosol was largest. As suggested by the referee, we further found that the average contribution of coarse particles to total Al in TSP was also lowest in spring. In addition, during dust periods the average contributions of coarse particles to Fe and Al in TSP were even slightly smaller than the average values in spring. We tentatively believe that is because for desert dust aerosol, Fe and Al were enriched in fine particles while the major component in coarse particles was quartz; of course, this is subject to further discussion and investigation.

Accordingly, in the revised manuscript (page 12) we have made the following change: "The average contribution of coarse particles to total Fe in TSP (total suspended particles) were 29%, 57%, 63% and 47% in spring, summer, autumn and winter, being lowest in spring when the influence of desert dust aerosol was largest. Statistical analysis (paired t-test) suggested that compared to fine particles, total Fe in coarse particles was significantly lower in spring ( $p < 0.01$ ,  $\alpha = 0.05$ ) while significantly higher in summer and autumn ( $p < 0.01$ ,  $\alpha = 0.05$ ); in addition, there was no significant difference between coarse and fine particles in winter ( $p = 0.13$ ,  $\alpha = 0.05$ ). The average contribution of coarse particles to total Al in TSP were 26%, 50%, 54% and 40% in spring, summer, autumn and winter, also being lowest in spring. Furthermore, during dust periods (12-17 and 27-30 April) the average contribution of coarse particles was found to be 24% for total Fe and 23% for total Al in TSP, even slightly smaller than the average values in spring. This is probably because for desert dust aerosol, Fe and Al were enriched in fine particles while the major component in coarse particles was quartz (Journet et al., 2014); nevertheless, further measurements are needed to better understand size distribution of trace metals in desert dust aerosol."

L199: Aerosol particles collected in North America and the Atlantic Ocean are unlikely appropriate comparison targets of Fe solubility in aerosol particles collected in China. I would suggest a comparison with dissolved iron in aerosols collected in Xi'an (e.g., He et al., 2021; Lei et al., 2023).

**Reply:** Here in our original manuscript we compared our observed seasonal variation of total Fe at Xi'an with those reported by Yang et al. (2020) on an Island in China and by Chen and Siefert (2004) over the Atlantic Ocean. Seasonal variations obtained at different regions can be comparable, though it may not be appropriate to compare actual concentrations or solubility, as pointed out by the referee.

We also would like to thank the referee for bringing our attention to the two papers (He et al., 2021; Lei et al., 2023). We have added a new section (Section 4.1.2) in the revised manuscript

(page 21-22) to compare Fe solubility reported in our present work with those reported in previous studies carried out in China (including the two papers mentioned by the referee). As the referee raised similar concerns in a previous comment, we kindly refer him/her to the revised manuscript and our response to the previous comment for more details.

L208: In general, [Fe]/[Al] means molar concentration ratio rather than mass concentration ratio. Please removed the bracket.

**Reply:** We have removed all the brackets in the revised manuscript. Furthermore, as suggested by the referee, in the revised manuscript and SI we always A/B to represent mass ratios and [A]/[B] to represent molar mass ratios.

L258–261: Coal combustion is also a dominant source of K<sup>+</sup> in fine aerosol particles. Indeed, dissolved Fe concentration correlated with Pb as a tracer element of coal combustions. In addition, fuel oil (e.g., heavy oil, gasoline, and diesel) combustions emit dissolved Fe. Furthermore, the steel industry is the dominant source of anthropogenic Fe-oxides. A more detailed discussion of the emission sources of dissolved Fe in aerosol particles is needed.

L262–265: Please discuss in detail regarding emission sources of Pb and dissolved Fe in coarse and fine aerosol particles. Lead in fine aerosol particles is derived from high-temperature combustions (e.g., coal combustions and municipal solid waste incineration). In contrast, Pb in coarse aerosol particles is derived from the resuspension of road dust (e.g., the pigment of road paint). Therefore, emission sources of dissolved Fe are likely different between coarse and fine aerosol particles.

**Reply:** The two comments are both directly related to sources of dissolved aerosol Fe, and are thus addressed together.

As suggested by ref#3, in the revised manuscript (page 16-17) we have discussed correlations between dissolved Fe and several aerosol species (including but not limited to K<sup>+</sup>) to further use the information provided in Table S3. After revision, we have gained further insights into important sources for dissolved aerosol Fe, including secondary formation, biomass burning, as well as vehicle emission, coal combustion, steel industry and metal smelting. Please refer to the last two paragraphs (page 16-17) in Section 3.3 for more details.

We carried out literature survey and also consulted a few colleagues who knows aerosol metal sources very well. We are not sure if coal combustion is an important source of aerosol K<sup>+</sup>. If ref #3 could provide some literature, we can further revise our manuscript. We have also revised manuscript to discuss the correlation between Pb and dissolved Fe, and please kindly refer to our revised manuscript (page 17) for more details.

L305–306: Please explain why the inverse relationship between Fe solubility and total Fe in autumn samples could not be observed. In addition, it seems that the constant of a and the power of b in equation 1 has seasonal dependence. Please discuss the reason for the seasonal variation of the fitting equation.

**Reply:** First of all, several mechanisms could possibly explain such inverse relationship, but we have not reached a consensus. In the revised manuscript (page 19) we have added a sentence for further explanation of such inverse dependence: “Several mechanisms can qualitatively explain such inverse dependence, but a consensus has not been reached yet (Mahowald et al., 2018; Meskhidze et al., 2019).”

Our main purpose of line 305-306 in the original manuscript is to state clearly (and remind interested colleagues) that such inverse dependence is not universe, though widely reported. However, it is not clear yet why such inverse dependence was not observed in some studies. In response to the referee, in the revised manuscript (page 20) we have added one sentence to

acknowledge that it is not clear yet why such inverse dependence was not observed in some studies: “It is not clear yet why such inverse dependence was not observed in these studies.”

We would like to thank the referee for bringing our attentions to seasonal variations of the two constants. In addition to seasonal variations, we further find that these values also differ between fine and coarse particles. We have carefully thought about the physical meanings of these two constants: the physical meaning of  $a$  is not obvious, while  $b$  represents the sensitivity of Fe solubility to relative change in total Fe concentration. In the revised manuscript (page 19) we have added the following sentence to explain the physical meaning of  $b$ : “...where  $f_s(\text{Fe})$  is Fe solubility and  $[\text{Fe}]_T$  is total Fe concentration, and  $b$  represents the sensitivity of Fe solubility to relative change in total Fe concentration.”

Furthermore, in the revised manuscript (page 21) we have added one paragraph to discuss seasonal and size variations of  $b$  values: “A larger  $b$  value means that Fe solubility is more sensitive to relative change in total Fe concentration. For our measurements conducted at Xi’an,  $b$  values were determined to be 0.30, 0.23 and 0.91 in spring, summer and winter for fine particles (Figure S7), and 0.52, 0.65 and 1.16 for coarse particles (Figure 5). One can see that the  $b$  values in winter were much larger than those in spring and summer for both fine and coarse particles; furthermore, in each of the three seasons (spring, summer and winter), the  $b$  value was larger for coarse particles than fine particles.” Nevertheless, currently we do not know how to explain seasonal and size dependence of  $b$  values.

L347–349: Why not evaluate the relationship of Fe solubility with nitrate and sulfate separately? Identifying the acid species that increase iron solubility is one of the important topics.

**Reply:** We indeed evaluated the relationship of Fe solubility with nitrate and sulfate separately, though these results are not shown in our original manuscript. In the revised SI, we have included two figures to show the correlations of Fe solubility with  $[\text{sulfate}]/[\text{Fe}]$  (Figure S10) and  $[\text{nitrate}]/[\text{Fe}]$  (Figure S11). In addition, in the revised manuscript (page 26) we have added one sentence to describe the overall result which we can obtain from these two figures: “In addition, as shown in Figures S10-S11, correlations of Fe solubility with  $[\text{nitrate}]/[\text{Fe}]$  were better than (or very similar to) these with  $[\text{sulfate}]/[\text{Fe}]$  for coarse particles in the four seasons, whereas no obvious trend was not observed for fine particles.”

L369: Ass rephrased by as.

**Reply:** This typo has been corrected in the revised manuscript (page 27).

L414–416: Please explain why Fe solubility was low (<1%) in some aerosol particles despite low pH and high RH. Also, were the aerosol samples with lower Fe solubility at low pH and high RH found in a particular season or in any season?

**Reply:** These samples were found in all the four seasons, though their occurrence in winter was less frequent. It is not clear why low Fe solubility still occurred despite high RH and aerosol acidity, but Fe mineralogy may be a key reason. In the revised manuscript (page 30) we have added a few sentences for further discussion: “In total 34 samples for coarse particles (9 in spring, 8 in summer, 12 in autumn and 5 in winter) and 18 samples for fine particles (7 in spring, 6 in summer, 4 in autumn and 1 in winter) fulfilled the above conditions ( $\text{pH}<4$ ,  $\text{RH}>80\%$ , and Fe solubility  $<1\%$ ). Fe mineralogy may possibly explain the observed low Fe solubility despite high RH and aerosol acidity, and concurrent measurements of Fe mineralogy could provide further clues.”

L416-419: Specific surface area is one of the factors controlling fractional Fe solubility in aerosol particles (Baker and Jickells, 2006; McDaniel et al., 2019). The specific surface area of fine aerosol particles is usually higher than that of coarse aerosol particles, indicating that fine aerosol particles are more reactive than coarse aerosol particles. Therefore, the fact that the Fe

solubility of fine aerosol particles is higher than that of coarse aerosol particles does not guarantee that the contribution of anthropogenic Fe to Fe solubility is greater.

**Reply:** We agree with the referee. In response to this comment, in the revised manuscript (page 30) we have changed this sentence to make our statement more conservative and to mention the paper by McDaniel et al. (2019): “If we assume at the same pH range Fe solubility enhancement by acid processing was similar for fine and coarse particles, the results displayed in Figure 9 may imply that anthropogenic and pyrogenic Fe played a more important role in Fe solubility enhancement in fine particles at Xi’an, when compared to coarse particles. Mcdaniel et al. (2019) found that soluble Fe concentration was strongly correlated with aerosol surface area for size-resolved aerosol samples collected from several different regions, and suggested surface area as the main factor which affected Fe solubility; they further suggested that this was because Fe solubility enhancement by acid processing could be more effective for aerosol particles with larger surface area and thus smaller particle size.”

We were aware of the work by Mcdaniel et al. (2019) quite a while ago, and to be honest we do not quite agree with them; nevertheless, we fully realize that the mechanism we proposed in our current manuscript also has a caveat. For aerosol Fe solubility which is important but quite uncertain, it can be very useful for advancement of our understanding to propose different mechanisms which will be examined by further work.

The seminal work by (Baker and Jickells, 2006) has been cited in the introduction, and is thus not cited here. One reason is that their explanation of the observed size dependence of Fe solubility may not be correct, as discussed in several previous papers (for example, Mahowald et al., 2018; Shi et al., 2011b).

L425–429: Indeed, aerosol pH in spring was higher than those in autumn, but median temperature and RH were almost the same between spring and autumn. Therefore, temperature and RH are not the reason for the higher pH of spring than autumn. One possible reason for high aerosol pH in spring is the large abundance of CaCO<sub>3</sub> in Asian dust that acts as buffer species. Please discuss the seasonal variability of aerosol pH with accurate descriptions of the relationship of aerosol pH with temperature, RH, non-volatile cation concentration, etc.

**Reply:** The referee’s comment on seasonal variation of aerosol pH is absolutely correct, and desert dust had large effects on aerosol pH in spring at Xi’an. In our original manuscript we did not discuss explicitly seasonal variation of aerosol pH as this is not the focus of manuscript, though it seems that we imply temperature as the main reason for seasonal variation of aerosol pH.

In response to this comment, we have added a few sentence in the revised manuscript (page 31) to discuss briefly while explicitly seasonal variations of aerosol pH at Xi’an: “Compared to summer and autumn, lower temperature in winter favored partitioning of ammonium in aerosol particles and thus led to higher aerosol pH. Average temperatures were similar in spring and autumn at Xi’an (Table S1), but aerosol pH was higher in spring than autumn (Table S4). Higher aerosol pH in spring at Xi’an, when compared to autumn, was caused by increase of non-volatile cations in spring due to the occurrence of desert dust aerosol; in fact, we found that abundance of Ca<sup>2+</sup> (relative to sulfate) was much higher in spring for both fine and coarse particles.”

L427: Please rephrase Table S5 by Table S4.

**Reply:** We have corrected it in the revised manuscript (page 31).

Figure 1: Does the solid line represent the median and the closed square the mean? Please provide legends for the median and average (as well as other box plots).

**Reply:** Some box plots in our original manuscript (Figures 6, 8 and 9) have already had legends. In the revised manuscript all the box plots have been updated to include legends for figures in the main manuscript and SI.

Figure 3: Several plots in panels (c) and (d) are shown with cross symbol. What does the cross symbol represent? Cross symbols can be found in Figures 7, S6 and S11.

**Reply:** Cross symbols represent data points which are not included in fitting. For the revised manuscript, we have include the following sentence in all the relevant figure captions to make this clear: “Cross symbols represent data points which are not included in fittings.”

Table S3. More detailed discussion on correlation of dissolved Fe concentration with trace elements are required to estimate anthropogenic Fe source. Are correlation coefficients higher than 0.5 listed in bold? If so, please specify that. Also, please bold the correlation coefficient for Pb in fine grains collected in winter.

**Reply:** As suggested, we have made substantial change to Section 3.3 in the revised manuscript (page 17) in order to further discuss these correlations (between dissolved Fe and trace elements) and sources of dissolved Fe. As the referee also had similar comments previously, he/she is kindly referred to our reply to these comments for further information.

Indeed we highlight all the coefficients higher than 0.5 in bold. In the revised SI we have updated the table caption to provide such information: “Correlation coefficients (**R**) for dissolved Fe with other species in different seasons. In this table, R values which are >0.5 are highlighted in bold.” In addition, the R value for Pb in fine particles collected in winter are highlighted in bold in the revised SI.

Figure S7. This figure is not cited in the main text.

**Reply:** We have included new figures in the supporting information, and updated the main text accordingly. All the figures and tables in the supporting information have been mentioned in the revised manuscript.
